# Supplementary material for: Shifts in Soil Bacterial Communities under Three-Year Fertilization Management and Multiple Cropping Systems
Source: MDPI journal article supplement (doi:10.3390/soilsystems8010005), 2024-01-03
Supplement: s1 [file s1]

Supplementary Table S1. The timeline of the experiment.

|                                                  | 2018- 2019<br>Tomato ( <i>Solanum<br/>lycopersicum</i> L.<br>cv. Dobler) | 2019-2020<br>Watermelon ( <i>Citrullus<br/>lanatus</i> cv. Modellino) | 2020 - 2021<br>Pepper ( <i>Capsicum<br/>annuum</i> L. cv. Senise) |
|--------------------------------------------------|--------------------------------------------------------------------------|-----------------------------------------------------------------------|-------------------------------------------------------------------|
| Sowing the green manure crops                    | 19/10/2018                                                               | 22/10/2019                                                            | 14/10/2020                                                        |
| Turning green manure crops back<br>into the soil | 04/04/2019                                                               | 23/04/2020                                                            | 05/04/2021                                                        |
| Crops transplanting                              | 09/05/2019                                                               | 23/04/2020                                                            | 05/04/2021                                                        |
| Crop density                                     | 3.1 plant m <sup>-2</sup>                                                | 0.83 plant m <sup>-2</sup>                                            | 2.5 plant m <sup>-2</sup>                                         |
| Crops harvesting                                 | 06/08/2019                                                               | 28/07/2020- 07/08/2020                                                | 24/08/2021 – 07/09/2021                                           |
